# Supplementary material for: The efficacy of Memantine combined with Speech language therapy for post stroke non-fluent aphasia rehabilitation: A randomized controlled clinical study
Source: Research Square preprint supplement (doi:10.21203/rs.3.rs-4020634/v1), 2024-03-21
Supplement: Supplementary file 1 [file 1ccafd598d85ef648b85b962.xlsx]

## Sheet: Sheet1
Table 2 Within-group and between-group comparisons between baseline and scores on each time point from visit 1 to 4
label	Memantine group	Placebo group	Change in memantine group（`x±SD）	Change in placebo group （`x±SD）	Memantine group vs baseline(p)	Placebo group vs baseline(p)	Change of LSM (`x,95%CI)	Change of LSM between groups	Change of LSM between groups (corrected, p value）
	（`x±SD）	（`x±SD）						(uncorrected, p value）
V1 ,week 4
WAB-AQ	51.6 ± 26.0	59.2 ± 18.6	7.1 ± 4.0	5.6 ± 3.3	<0.001*	<0.001*	1.5 (-0.6, 3.6)	0.16	0.31
Spontaneous speech -AQ	9.6 ± 5.3	11.5 ± 4.3	1.3 ± 1.0	0.8 ± 0.8	<0.001*	<0.001*	0.5 (0.0, 1.1)	0.049	0.1
Auditory comprehension -AQ	6.9 ± 2.3	7.6 ± 2.4	1.0 ± 0.8	0.6 ± 0.6	<0.001*	<0.001*	0.4 (0.0, 0.8)	0.04	0.04*
Repeating -AQ	6.0 ± 3.9	7.0 ± 2.7	0.6 ± 0.6	0.5 ± 0.6	<0.001*	<0.001*	0.1 (-0.2, 0.5)	0.45	0.89
Naming -AQ	3.4 ± 2.7	3.2 ± 2.0	0.7 ± 1.0	0.6 ± 1.7	0.001*	0.001*	0.2 (-0.6, 1.0)	0.66	0.36
MMSE	12.3 ± 6.7	14.8 ± 7.9	3.0 ± 2.7	2.4 ± 3.2	<0.001*	<0.001*	0.6 (-1.2, 2.3)	0.53	0.57
V2 ,week 8
WAB-AQ	60.1 ± 24.4	62.7 ± 15.9	15.7 ± 9.2	10.1 ± 4.0	<0.001*	<0.001*	5.6 (1.4, 9.8)	0.01	0.04*
Spontaneous speech -AQ	11.4 ± 4.8	11.9 ± 3.5	3.0 ± 2.0	1.3 ± 1.2	<0.001*	<0.001*	1.7 (0.7, 2.7)	0.001	0.006*
Auditory comprehension -AQ	7.7 ± 2.0	8.1 ± 2.2	1.8 ± 1.3	1.1 ± 0.8	<0.001*	<0.001*	0.7 (0.1, 1.4)	0.03	0.08
Repeating -AQ	6.5 ± 3.7	7.4 ± 2.5	1.1 ± 1.3	0.9 ± 1.0	<0.001*	<0.001*	0.3 (-0.4, 0.9)	0.44	0.76
Naming -AQ	4.5 ± 2.7	3.9 ± 1.9	1.8 ± 1.5	1.4 ± 2.0	<0.001*	<0.001*	0.4 (-0.6, 1.4)	0.4	0.3
MMSE	15.2 ± 6.9	15.7 ± 7.6	6.0 ± 4.4	3.3 ± 2.9	<0.001*	<0.001*	2.7 (0.4, 4.9)	0.02	0.04*
V3, week 12
WAB-AQ	65.5 ± 24.3	65.6 ± 16.1	21.0 ±11.2	13.0 ± 4.6	<0.001*	<0.001*	8.0 (2.9, 13.0)	0.003	0.01*
Spontaneous speech-AQ	12.3 ± 4.7	12.0 ± 3.6	4.0 ± 2.1	1.5 ± 1.3	<0.001*	<0.001*	2.5 (1.4, 3.5)	<0.001	<0.001*
Auditory comprehension -AQ	8.7 ± 2.8	8.4 ± 2.1	2.8 ± 2.2	1.4 ± 1.0	<0.001*	<0.001*	1.3 (0.3, 2.4)	0.01	0.03*
Repeating -AQ	7.0 ± 3.6	7.8 ± 2.3	1.6 ± 1.5	1.3 ± 1.0	<0.001*	<0.001*	0.3 (-0.5, 1.1)	0.42	0.82
Naming -AQ	5.1 ± 2.8	4.7 ± 1.9	2.5 ± 2.0	2.1 ± 2.1	<0.001*	<0.001*	0.4 (-0.8, 1.6)	0.52	0.55
MMSE	16.5 ± 6.8	16.9 ± 7.3	7.2 ± 4.9	4.3 ± 3.3	<0.001*	<0.001*	2.9 (0.4, 5.5)	0.03	0.048*
V4 ,week 16
WAB-AQ	68.9 ± 23.8	67.8 ± 15.5	24.5 ± 13.1	15.2 ± 4.9	<0.001*	<0.001*	9.3 (3.4, 15.1)	0.003	0.01*
Spontaneous speech -AQ	13.0 ± 4.6	12.2 ± 3.6	4.7 ± 2.7	1.7 ± 1.2	<0.001*	<0.001*	3.0 (1.8, 4.2)	<0.001	<0.001*
Auditory comprehension -AQ	8.6 ± 1.8	8.5 ± 2.1	2.7 ± 1.8	1.5 ± 1.1	<0.001*	<0.001*	1.2 (0.3, 2.1)	0.01	0.04*
Repeating -AQ	7.2 ± 3.5	8.0 ± 2.1	1.8 ± 1.6	1.5 ± 1.2	<0.001*	<0.001*	0.4 (-0.5, 1.2)	0.39	0.81
Naming -AQ	5.7 ± 2.9	5.2 ± 1.9	3.0 ± 2.3	2.6 ± 2.1	<0.001*	<0.001*	0.4 (-0.9, 1.7)	0.52	0.52
MMSE	17.5 ± 7.3	18.1 ± 7.3	8.3 ± 5.9	5.5 ± 3.2	<0.001*	<0.001*	2.8 (-0.1, 5.7)	0.06	0.1
WAB: Western Aphasia Battery, AQ: Aphasia Quotient, MMSE: Mini-Mental State Examination,*:p＜0.05
